# Supplementary material for: Fabrication and characterization of β-PbO2/α-PbO2/Sb–SnO2/TiO2nanotube array electrode and its application in electrochemical degradation of Acid Red G
Source: Royal Society of Chemistry journal article supplement (doi:10.1039/c4ra16613b), 2015-01-01
Supplement: c4ra16613b1.pdf [file c4ra16613b1.pdf]

## Supplementary Information

### Fabrication and characterization of $\beta$ -PbO<sub>2</sub>/ $\alpha$ -PbO<sub>2</sub>/Sb-SnO<sub>2</sub>/TiO<sub>2</sub> nanotube arrays electrode and its application in electrochemical degradation of Acid Red G

Jia Wu <sup>a</sup>, †Hao Xu <sup>a\*</sup>, †Wei Yan <sup>a, b\*\*</sup>

<sup>a</sup>Department of Environmental Science and Engineering, Xi'an Jiaotong University, Xi'an 710049, China

<sup>b</sup>State Key Laboratory of Multiphase Flow in Power Engineering, Xi'an Jiaotong University, Xi'an 710049, China

Corresponding authors:

E-mail: [xuhao@mail.xjtu.edu.cn](mailto:xuhao@mail.xjtu.edu.cn); [yanwei@mail.xjtu.edu.cn](mailto:yanwei@mail.xjtu.edu.cn)

Tel.: +86-13032912105; fax: +86-29-82664731.

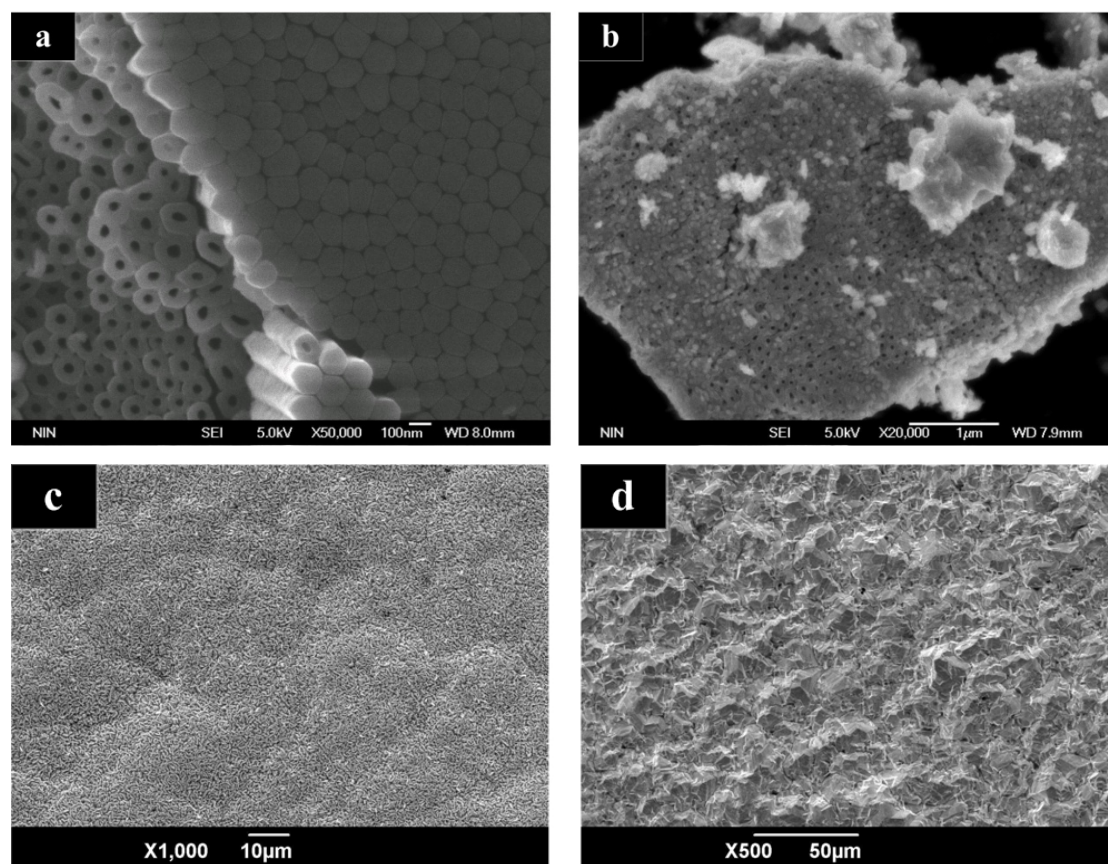

Fig. 1S. FE-SEM (a) the bottom view of plain TiO<sub>2</sub> NTAs; (b) the bottom view of Sb-SnO<sub>2</sub>/TiO<sub>2</sub> NTAs; (c) the top

view of  $\alpha$ -PbO<sub>2</sub>/Sb-SnO<sub>2</sub>/TiO<sub>2</sub> NTAs; (d) the top view of  $\beta$ -PbO<sub>2</sub>/ $\alpha$ -PbO<sub>2</sub>/Sb-SnO<sub>2</sub>/TiO<sub>2</sub> NTAs.

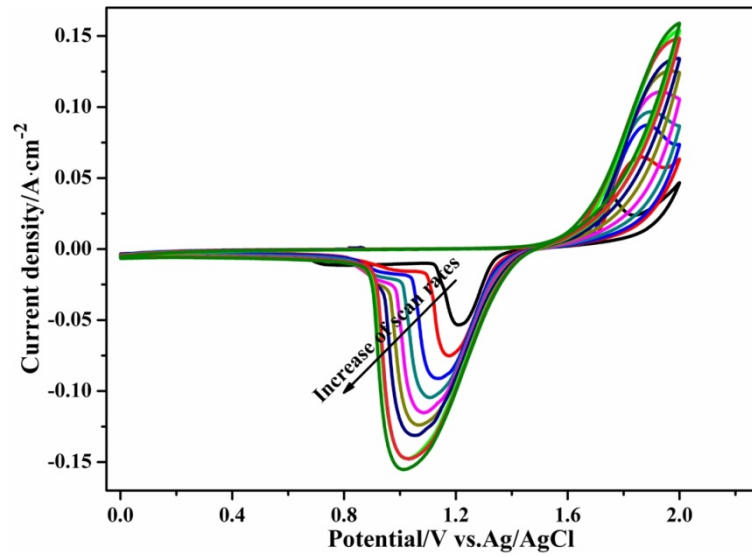

Fig. 2S. Cyclic voltammograms (CV) curve for the  $\beta$ -PbO<sub>2</sub>/ $\alpha$ -PbO<sub>2</sub>/Sb-SnO<sub>2</sub>/TiO<sub>2</sub> NTAs electrode with different scan rates in 0.5 M H<sub>2</sub>SO<sub>4</sub> solution.

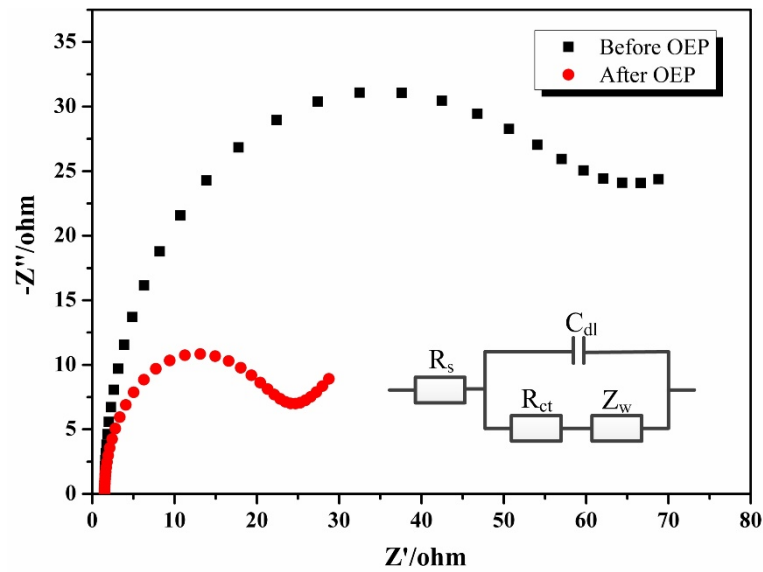

Fig. 3S. EIS measurement results and the simulated circuit.

Table. 1S. Simulated data of each parameter.

|            | $R_s/\text{ohm}\cdot\text{cm}^{-2}$ | $C_{dl}/\text{F}\cdot\text{cm}^{-2}$ | $R_{ct}/\text{ohm}\cdot\text{cm}^{-2}$ | $Z_w/S\cdot\text{sec}^{-1}\cdot\text{cm}^{-2}$ |
|------------|-------------------------------------|--------------------------------------|----------------------------------------|------------------------------------------------|
| Before OEP | 1.5                                 | 0.024                                | 56.0                                   | 0.16                                           |
| After OEP  | 1.5                                 | 0.021                                | 20.1                                   | 0.33                                           |

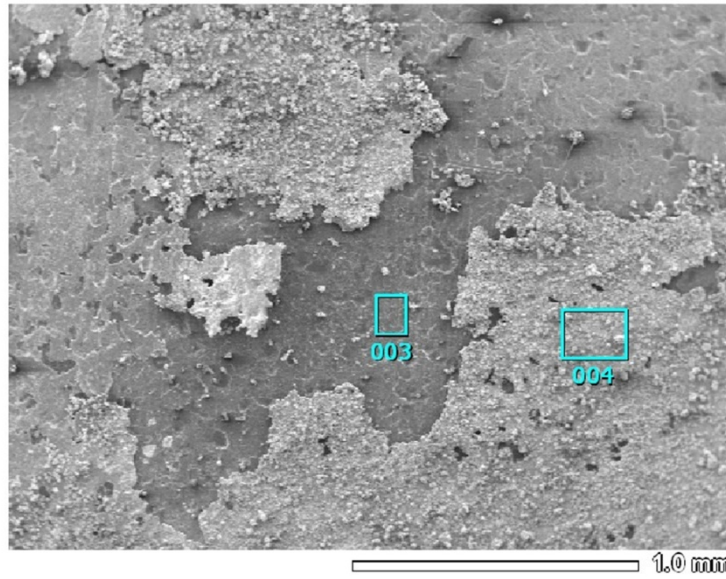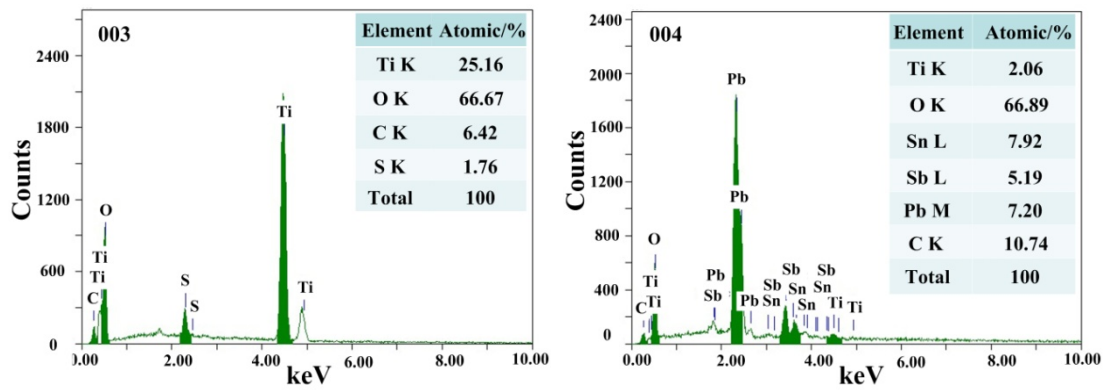

Fig. 4S. EDS measurement results of the deactivated electrode

Table. 2S. Simulated data of the normal electrode and the deactivated electrode

|                       | $R_s/\text{ohm}\cdot\text{cm}^{-2}$ | $C_{dl}/\text{F}\cdot\text{cm}^{-2}$ | $R_{ct}/\text{ohm}\cdot\text{cm}^{-2}$ | $Z_w/S\cdot\text{sec}^{.5}\cdot\text{cm}^{-2}$ |
|-----------------------|-------------------------------------|--------------------------------------|----------------------------------------|------------------------------------------------|
| Normal electrode      | 1.5                                 | 0.021                                | 20.1                                   | 0.33                                           |
| Deactivated electrode | 3.1                                 | 4.795E-5                             | 122.5                                  | 0.02                                           |
